# Supplementary material for: A water supply tunable bilayer evaporator for high-quality solar vapor generation
Source: Royal Society of Chemistry journal article supplement (doi:10.1039/d2nr01595a), 2022-01-01
Supplement: d2nr01595a4.pdf [file d2nr01595a4.pdf]

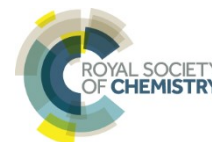

Nanoscale

ARTICLE

## Supporting Information

# Water supply tunable bilayer evaporator for high-quality solar vapor generation

Xiangyi Zhang,<sup>a</sup> Tongyuan Li,<sup>a</sup> Wenlong Liao,<sup>a</sup> Dongzhi Chen,<sup>a, b</sup> Ziwei Deng,<sup>c</sup> Xin Liu<sup>a, b</sup> and Bin Shang<sup>a, b\*</sup>

<sup>a</sup> School of Materials Science and Engineering, Wuhan Textile University, Wuhan, 430200, P. R. China

<sup>b</sup> State Key Laboratory of New Textile Materials and Advanced Processing Technologies, Wuhan Textile University, Wuhan, 430073, P. R. China

<sup>c</sup> Key Laboratory of Applied Surface and Colloid Chemistry, National Ministry of Education, Shaanxi Key Laboratory for Advanced Energy Devices, Shaanxi Engineering Lab for Advanced Energy Technology, School of Materials Science and Engineering, Shaanxi Normal University, Xi'an, 710119, China.

*Email: bshang@wtu.edu.cn*

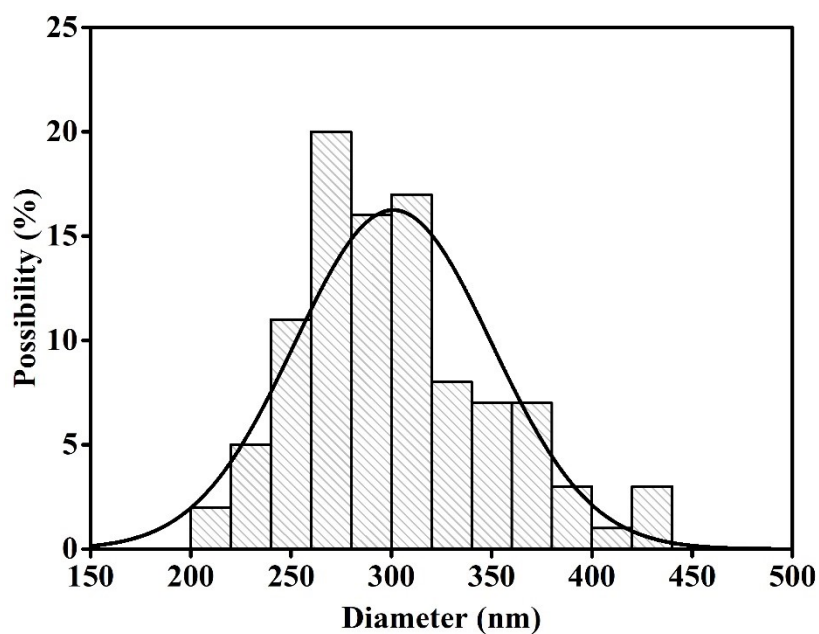

**Fig.S1.** Size distribution of the obtained raspberry-like particles.

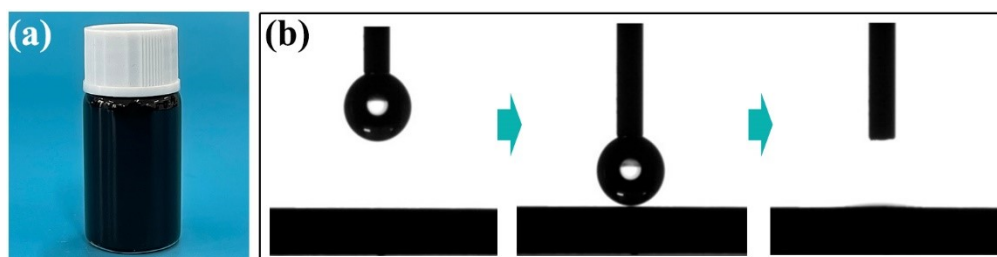

**Fig.S2.** (a) Photo of the obtained  $\text{Fe}_3\text{O}_4@\text{PDA}$  dispersed in water. (b) Wetting behavior of water on the  $\text{Fe}_3\text{O}_4@\text{PDA}$  surface.

### Supplementary movie captions

**Movie S1:** This movie shows the wetting behavior of water on the surface of SA-5% layer.

**Movie S2:** This movie shows the wetting behavior of water on the surface of SA-10% layer.

**Movie S3:** This movie shows the wetting behavior of water on the surface of SA-15% layer.
